# Supplementary material for: Co-dispersal of the blood fluke Schistosoma japonicum and Homo sapiens in the Neolithic Age
Source: PubMed Central journal article supplement (PMC4685303; doi:10.1038/srep18058), 2015-12-21
Supplement: srep18058-s1.pdf [file srep18058-s1.pdf]

## Co-dispersal of the blood fluke *Schistosoma japonicum* and *Homo sapiens* in the Neolithic Age

Mingbo Yin<sup>1#</sup>, Hong-Xiang Zheng<sup>1#</sup>, Jing Su<sup>1</sup>, Zheng Feng<sup>2</sup>, Donald P. McManus<sup>3</sup>, Xiaonong Zhou<sup>2</sup>, Li Jin<sup>1,4</sup>, Wei Hu<sup>1,2\*</sup>

<sup>1</sup> State Key Laboratory of Genetic Engineering and Ministry of Education Key Laboratory of Contemporary Anthropology, Collaborative Innovation Center for Genetics and Development, School of Life Sciences, Fudan University, Shanghai, 200438, China

<sup>2</sup> National Institute of Parasitic Diseases, Chinese Center for Disease Control and Prevention, Key Laboratory of Parasite and Vector Biology of the Chinese Ministry of Health, WHO Collaborating Center for Malaria, Schistosomiasis and Filariasis, Shanghai, 200025, China

<sup>3</sup> QIMR Berghofer Medical Research Institute, Brisbane, Queensland 4006, Australia

<sup>4</sup> Chinese Academy of Sciences Key Laboratory of Computational Biology, CAS-MPG Partner Institute for Computational Biology, SIBS, CAS, Shanghai, 200021, China

# Equal contribution author

\* Corresponding author: Wei Hu; e-mail: huw@fudan.edu.cn; phone: +86 (0)21 5163 0662; fax: +86 (0) 21 5163 0663

Table S1. Detailed information of *S. japonicum* samples used in the analysis.

| Population | N   | $\pi$   | $\theta$ | Latitude | Longitude | Infection <sup>a</sup> | Detailed population location                                                                                           |
|------------|-----|---------|----------|----------|-----------|------------------------|------------------------------------------------------------------------------------------------------------------------|
| AHGC       | 10  | 0.00462 | 0.00419  | 30.67    | 117.45    | 0.14%                  | Anhui Province, Guichi Country, Minsheng Village<br>Anhui Province, Tongling Country, Laozhou Island, Guanghui Village |
| AHTL       | 9   | 0.00403 | 0.00397  | 30.94    | 117.76    | 3.25%                  |                                                                                                                        |
| HBSS       | 10  | 0.0041  | 0.00306  | 30.32    | 112.35    | <0.01%                 | Hubei Province, Shashi City, Maling Village                                                                            |
| HNYY       | 10  | 0.00492 | 0.00673  | 29.34    | 113.07    | 0.02%                  | Hunan Province, Yueyang City, Laogang Village                                                                          |
| HNCD       | 10  | 0.00349 | 0.00389  | 28.94    | 112.16    | 0.93%                  | Hunan Province, Changde City, Wuyi Village                                                                             |
| JXDC       | 9   | 0.00475 | 0.00462  | 29.2     | 116.5     | 6.50%                  | Jiangxi Province, Duchang Country, Tangmei Village                                                                     |
| JXNC       | 10  | 0.00553 | 0.00663  | 28.21    | 116.16    | n.a.                   | Jiangxi Province, Nanchang City                                                                                        |
| Lake       | 68  | 0.00491 | 0.00939  | n.a.     | n.a.      | n.a.                   | n.a.                                                                                                                   |
| SCXC       | 9   | 0.00103 | 0.00107  | 27.5     | 102.2     | 0.14%                  | Sichuan Province, Xichang City, Daxing Township, Shian and Jianxin Villages combined                                   |
| YNEY       | 10  | 0.00042 | 0.00043  | 26.14    | 99.95     | n.a.                   | Yunnan Province, Dali City, Eryuan Country                                                                             |
| Mountain   | 19  | 0.00108 | 0.00132  | n.a.     | n.a.      | n.a.                   | n.a.                                                                                                                   |
| TW         | 10  | 0       | n.a.     | 23.85    | 120.92    | n.a.                   | Taiwan                                                                                                                 |
| IN         | 10  | 0       | n.a.     | -2.2     | 120.1     | n.a.                   | Indonesia                                                                                                              |
| PH         | 10  | 0       | n.a.     | 14.69    | 121.37    | n.a.                   | Philippines                                                                                                            |
| JP         | 2   | 0       | n.a.     | 36.5     | 138.3     | n.a.                   | Japan                                                                                                                  |
| ALL        | 119 | 0.00657 | 0.01171  | n.a.     | n.a.      | n.a.                   | n.a.                                                                                                                   |

<sup>a</sup> Infection rate in local snails

Table S2. Distribution of mutations in the *S. japonicum* mtDNA genome.

|                               | rRNA   | tRNA   | Protein coding region |        |        |        | noncoding | total  |
|-------------------------------|--------|--------|-----------------------|--------|--------|--------|-----------|--------|
|                               |        |        | all                   | 1st    | 2nd    | 3rd    |           |        |
| Length (bp)                   | 1748   | 1468   | 10076                 | 3346   | 3384   | 3346   | 795       | 14087  |
| Unvaried sites                | 1688   | 1412   | 9437                  | 3189   | 3324   | 2924   | 672       | 13209  |
| Number of varied sites        | 60     | 56     | 639                   | 157    | 60     | 422    | 123       | 878    |
| Proportion of varied sites    | 0.0343 | 0.0381 | 0.0634                | 0.0469 | 0.0177 | 0.1261 | 0.1547    | 0.0623 |
| Sites with a single hit       | 51     | 50     | 528                   | 137    | 55     | 336    | 90        | 719    |
| Sites with two hits           | 7      | 6      | 95                    | 19     | 4      | 72     | 27        | 135    |
| Sites with three or more hits | 2      | 0      | 16                    | 1      | 1      | 14     | 6         | 24     |
| Indels                        | 6      | 4      | 0                     | 0      | 0      | 0      | 20        | 30     |
| Substitution                  | 65     | 58     | 773                   | 178    | 66     | 529    | 159       | 1055   |
| Substitution per base pair    | 0.0372 | 0.0395 | 0.0767                | 0.0532 | 0.0195 | 0.1581 | 0.2       | 0.0749 |
| Transitions                   | 54     | 50     | 650                   | 158    | 55     | 437    | 133       | 887    |
| Transversions                 | 11     | 8      | 123                   | 20     | 11     | 92     | 26        | 168    |
| Transition/transversion ratio | 4.91   | 6.25   | 5.28                  | 7.9    | 5      | 4.75   | 5.115     | 5.28   |

Table S3. Age estimates for important haplogroups in *S. japonicum*.

| Node    | <i>n</i> | Maximum likelihood (kya) |                |                       | Bayesian (kya)    |
|---------|----------|--------------------------|----------------|-----------------------|-------------------|
|         |          | complete sequence        | protein coding | 3rd position of codon | complete sequence |
| A'B'C'D | 119      | 75.43 ± 9.58             | 75.11 ± 12.87  | 89.86 ± 16.38         | 75.45 ± 11.9      |
| A'B'C   | 109      | 21.76 ± 2.45             | 20.55 ± 3.28   | 22.77 ± 4.58          | 22.95 ± 3.77      |
| A'B     | 101      | 21.55 ± 2.44             | 20.55 ± 2.88   | 22.77 ± 4.22          | 22.89 ± 3.77      |
| C       | 8        | 15.4 ± 2.08              | 13.95 ± 2.45   | 15.39 ± 3.39          | 14.87 ± 2.61      |
| B       | 23       | 9.25 ± 1.17              | 7.66 ± 1.18    | 9.22 ± 1.78           | 9.56 ± 1.64       |
| B1      | 12       | 7.01 ± 1.04              | 5.99 ± 1       | 6.94 ± 1.43           | 7.16 ± 1.29       |
| B2      | 2        | 6.65 ± 1.17              | 5.61 ± 1.17    | 6.95 ± 1.69           | 5.95 ± 1.25       |
| B3      | 4        | 8.73 ± 1.27              | 6.62 ± 1.52    | 7.75 ± 2.19           | 7.96 ± 1.6        |
| B4      | 4        | 1.87 ± 2.29              | 0.99 ± 2.37    | 0.54 ± 5.59           | 1.97 ± 0.76       |
| A       | 77       | 13.37 ± 1.7              | 12.27 ± 1.83   | 12.81 ± 3.12          | 13.82 ± 2.31      |
| A2      | 3        | 5.48 ± 1.54              | 5.11 ± 1.62    | 3.33 ± 2.17           | 5.53 ± 1.33       |
| A1      | 73       | 10.68 ± 1.21             | 10.13 ± 1.38   | 11.14 ± 2.12          | 10.94 ± 1.78      |
| A1a     | 48       | 7.05 ± 1.15              | 6.5 ± 1.36     | 7.14 ± 2.42           | 7.83 ± 1.38       |
| A1a2    | 29       | 5.82 ± 1.12              | 5.24 ± 1.42    | 6.15 ± 2.42           | 6.35 ± 1.16       |
| A1a2a   | 24       | 3.41 ± 1.33              | 2.89 ± 2.26    | 3.19 ± 3.5            | 3.84 ± 0.83       |
| A1a1    | 19       | 5.42 ± 1.03              | 4.84 ± 1.16    | 5.3 ± 2.75            | 5.97 ± 1.11       |
| A1a1b   | 10       | 2.41 ± 0.96              | 1.58 ± 0.94    | 1.69 ± 1.41           | 3.05 ± 0.79       |
| A1a1a   | 9        | 4.21 ± 0.98              | 4.33 ± 1.09    | 4.55 ± 2.81           | 4.75 ± 0.94       |

Table S4. Mutation rates estimated based on ML and Bayesian methods.

|            | Maximum likelihood ( $\times 10^{-8}$ /site/year) |                  |                       | Bayesian<br>( $\times 10^{-8}$ /site/year) |
|------------|---------------------------------------------------|------------------|-----------------------|--------------------------------------------|
|            | complete sequence                                 | protein coding   | 3rd position of codon | complete sequence                          |
| rRNA       | $6.67 \pm 1.13$                                   | -                | -                     | $7.17 \pm 1.48$                            |
| tRNA       | $8.52 \pm 1.33$                                   | -                | -                     | $7.92 \pm 1.59$                            |
| non-coding | $42.10 \pm 5.87$                                  | -                | -                     | $40.59 \pm 7.54$                           |
| 1st codon  | $10.39 \pm 1.23$                                  | $11.20 \pm 1.54$ | -                     | $10.84 \pm 1.81$                           |
| 2nd codon  | $4.17 \pm 0.60$                                   | $4.30 \pm 0.69$  | -                     | $3.89 \pm 0.72$                            |
| 3rd codon  | $33.33 \pm 3.62$                                  | $35.70 \pm 4.79$ | $30.70 \pm 5.04$      | $30.95 \pm 4.85$                           |

Note: Mutation rate estimates showed that the non-coding region evolved fastest for free of selective constraints while rRNA and tRNA were relatively conservative. In the protein coding region, the third position showed the highest rate as was evident for the non-coding region, while the second position evolved slowest due to its high effect on amino acid change.

Table S5. Population growth rates calculated from Bayesian Skyline Plots.

| Datasets            | Era                    | Growth began (kya) | 95% CI for start of growth | Population growth rate (%) | Fastest growth time (kya) | Maximum growth rate by interval (%) | Peak interval (kya) | Peak growth rate (%) |
|---------------------|------------------------|--------------------|----------------------------|----------------------------|---------------------------|-------------------------------------|---------------------|----------------------|
| <i>S. japonicum</i> | Neolithic Time         | 5.8                | 4.6-7.0                    | 0.01                       | 2.2-4.4                   | 0.02                                | 3.4                 | 0.024                |
|                     | Upper Paleolithic Time | 11.4               | 10.4-12.8                  | 0.005                      | 8.2-10.2                  | 0.015                               | 9.2                 | 0.016                |
| Human               | Neolithic Time         | 5.6                | 4.6-7.0                    | 0.005                      | 3.4-5.2                   | 0.027                               | 4.6                 | 0.033                |
|                     | Upper Paleolithic Time | 14                 | 12.2-16.6                  | 0.002                      | 8.4-12.2                  | 0.027                               | 10.8                | 0.038                |

Figure S1. MtDNA coverage distribution of the 119 *S. japonicum* samples used in the analysis. Note: Average coverage (black line) with 5% and 95% quantile coverage (dashed lines) for each mtDNA genome assembled in the study.

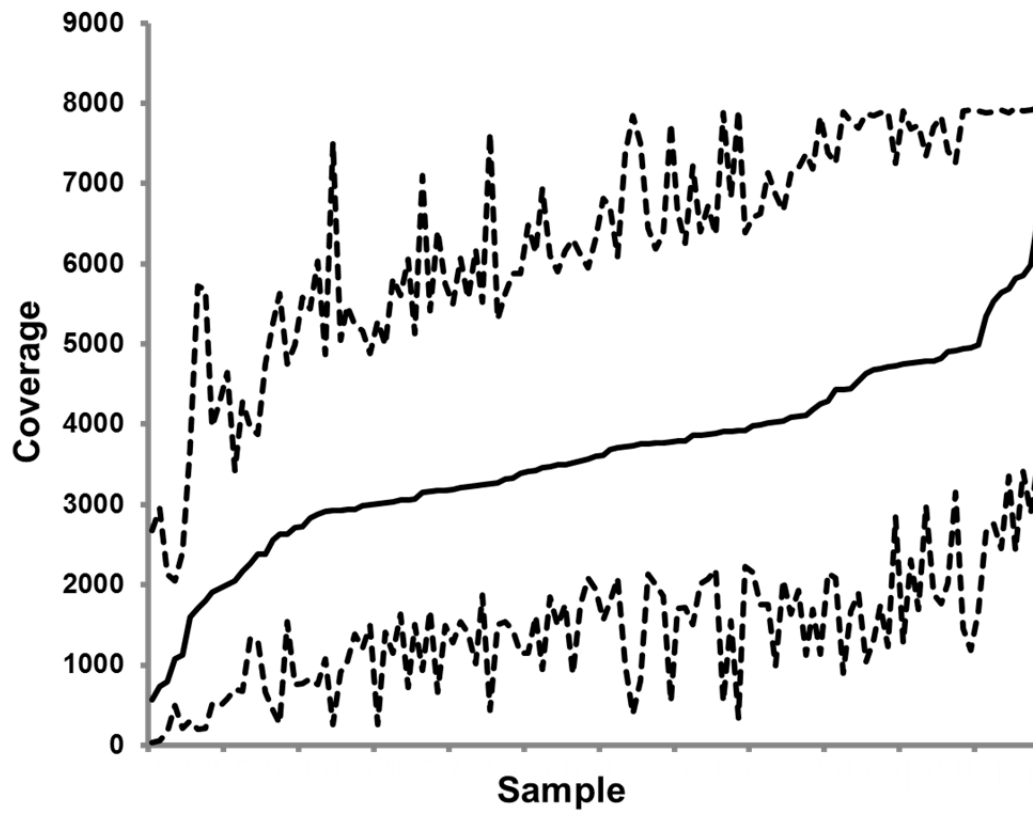

Figure S2. Variation distribution across the mtDNA genome of *S. japonicum*.

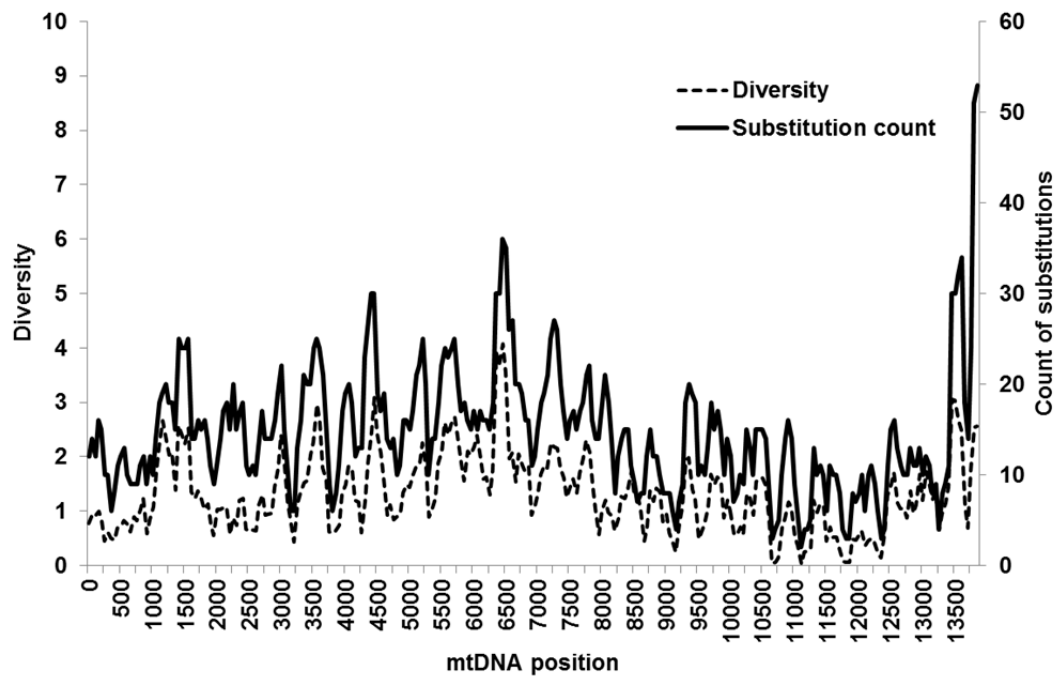

Note: The diversity and substitution were counted and calculated every sliding window of 200 bp (step size = 50 bp) along the entire mtDNA genome.



Figure S3. Detailed phylogenetic tree based on the mtDNA sequences of 119 *S. japonicum* samples. Every mutation is denoted to each haplogroup. Insertions are represented as ‘.’. Deletions were added as ‘d’ at the end. Blue denotes non-coding mutations. Red indicates synonymous mutations while Black means nonsynonymous mutations. Green indicates tRNA and rRNA variants. Refer to Table S1 for the abbreviations of each sample. (See supporting file 1)

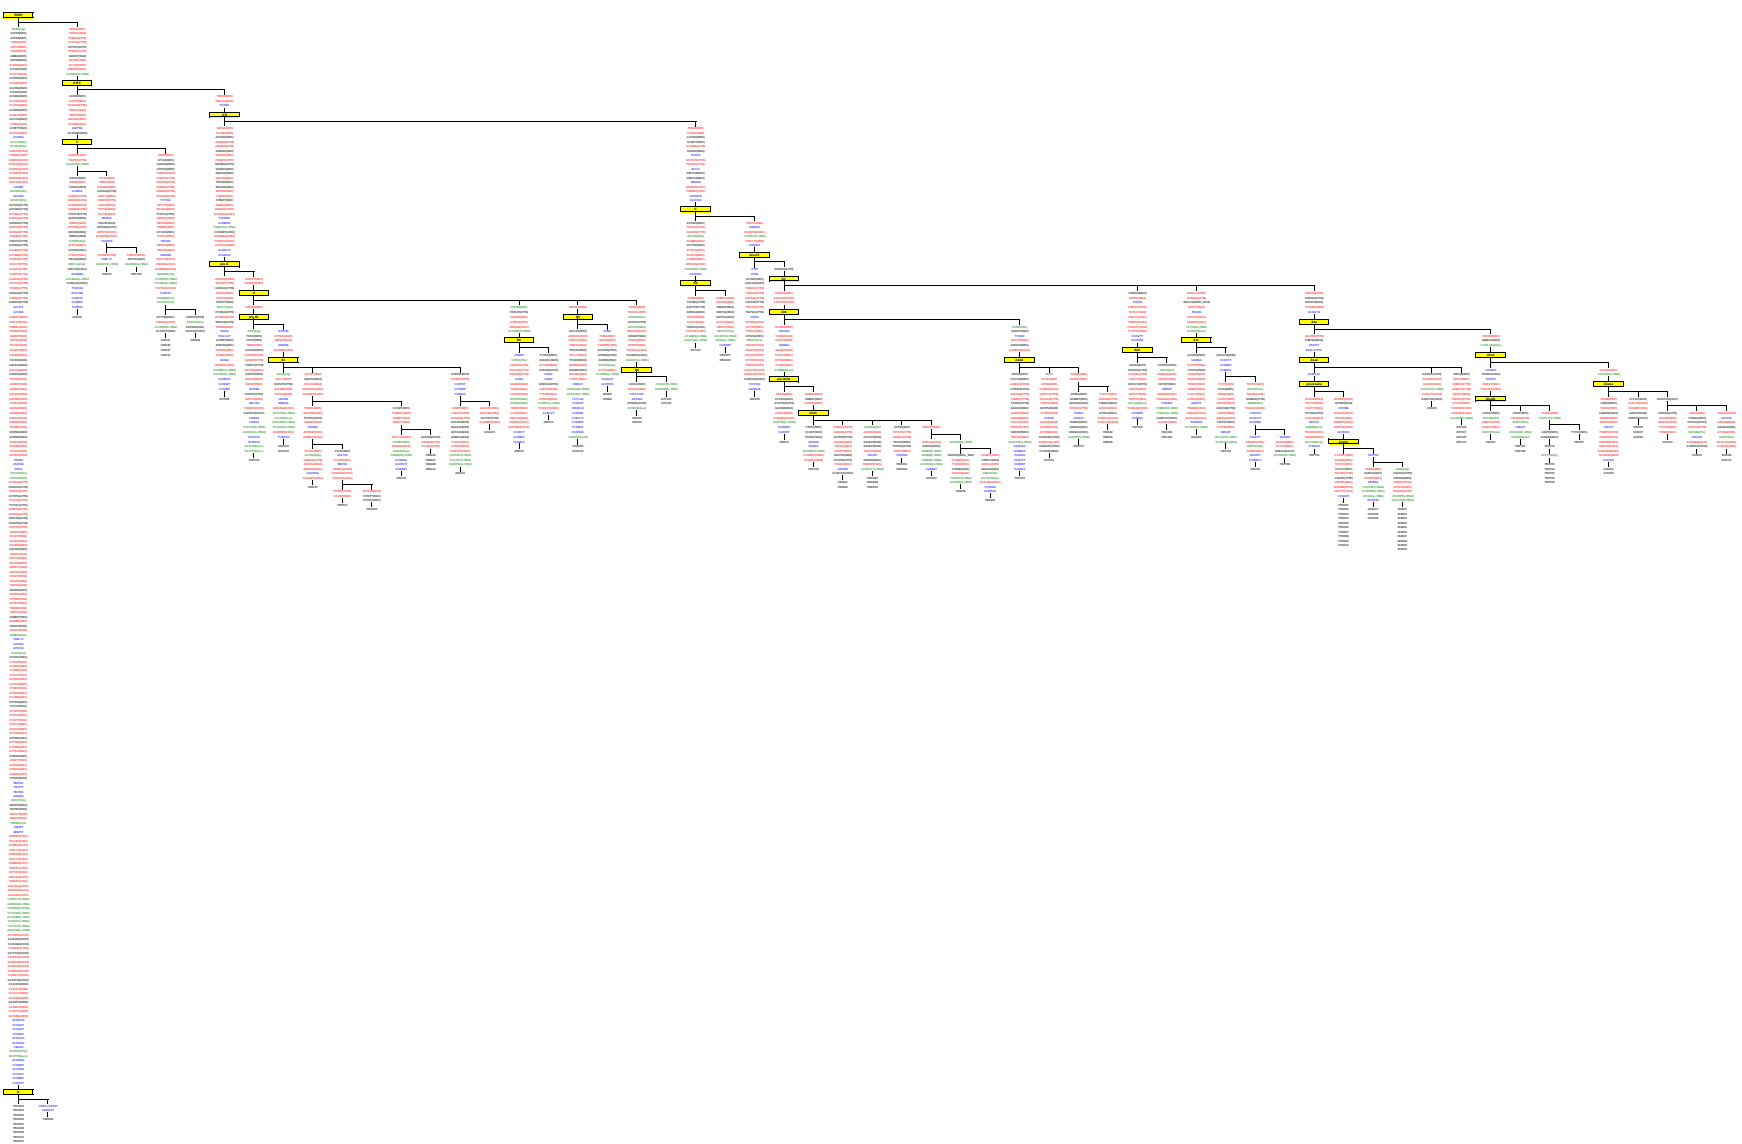

Figure S4. Time estimates of *S. japonicum* haplogroups.

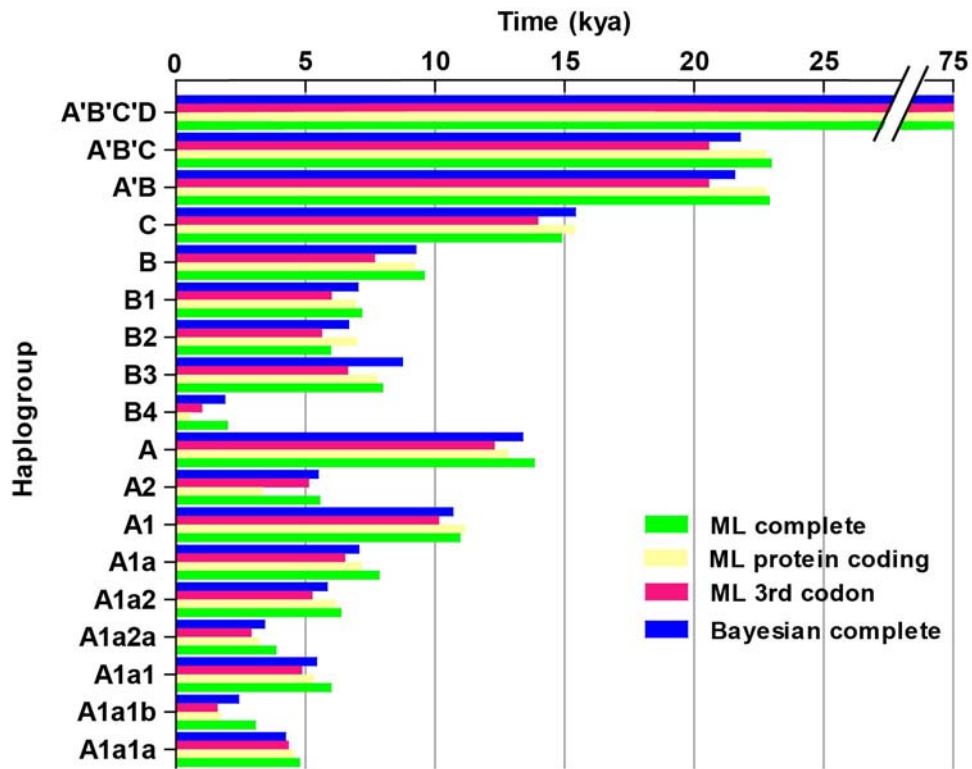

Figure S5 Phylogenetic tree of 120 complete *Schistosoma japonicum* mt genomes, based on Mrbayes. The red ID indicates the sequences from Attwood *et al* (2015). For the abbreviations of each sample, refer to table S1.

TW0007  
TW0006  
TW0005  
TW0010  
TW0004  
TW0001  
TW0008  
TW0009  
TW0002  
TW0003

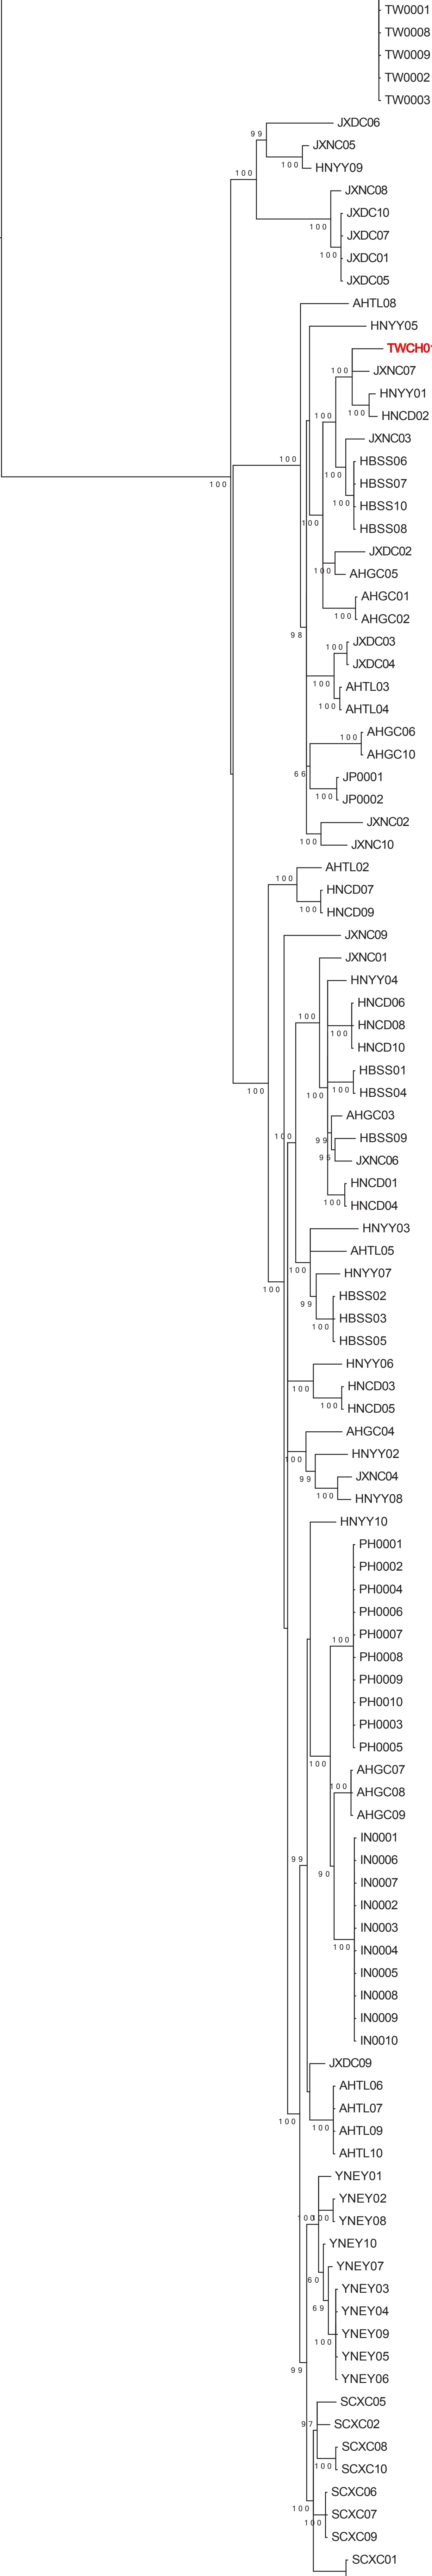

0.002

Supporting information:

>ref

CTGGAATCTTGAAGAGGGTTGTGTTTCGCCACAATTATGTAGAGTTTATTGTTTCTACTACCAGTGTTTT  
GCTGATGTTGTTAGGTTGAGTGGTATTTTTTTTTTTTTTTGGTTTTTTGTTTTAAATAATATAGATTTTGGTGG  
TTGAGTTAAGTTAATGTTGGTGGTTATTTGGTGTGTGATGTTTTGGTTTTCTTATAATAAAGAGTATAGTTC  
TTAGTTATTTTTATGTTGATGATTTGACTTATATATCTGTTATGTATAGTTTTTATTATTTTTCGTTAAGGAATG  
TCTCTTGGTACTTTCTTATAAATGGTTAGTTTTCTTTGGTTATGATTATTTAGTAATGACTAATAGTTTTTA  
GTTAGTTAATAATGTGAGAGTATCTGGTTTGATTAGTTATATTCTTATATGTTTTATGATAAATAGTTCTTCTT  
GCGTGGTGCTATGGTAACGTTAGTTTCTCTCGGTTTGGTGACGTTTGT TTTATTTGGTTCTTTATATTA  
TATTGGTGGTTGTGCTTATGTAAGTTTGTAGGGTTAGTAGTCTTTGTGATTGTGTCTACTAAGAGTGCTTGT  
TTCTTTTATTTCTGATTGTTAGAAGCTATGCGTGCTCCTACTCCAGTAAGTTCTTAGTTCATTTCGCAACTT  
TGGTTGCTTCTGGTGTCTGAATGGTTGGTAGTTATTATTTAATTGGGTTGGGAAAAAATAGTTATTTAGTT  
TATTTTTTTCAGTGTTGTTGTTTTTGACAATAGTGATAACTTCTGTTTGTCTTTATATTATAGTGATGTTAAGC  
AGTTAGTTGCTTGTCTACTAGTAAAAATTTCTTGGGTTTTTAAATTTGTCTATAGGTGATTATGATTGG  
CATTTGTTCAAGTTATTGGTTCATGCTGTTAGAAAGTGTATTATTCACTTTGGTTGGTATTATATAAGTTCAA  
GTTATGGTGGTCAAGATAAGAATCAAATTAATACTAAAATTTATGGTAAAGTGTGGTTAATTTATTTATTG  
TGTTGTTGGTGGTTTATCTGGTTTTCCATTTATGGGTTTATTTTAGAAAGCATGTTTTTTAGATAGGTATA  
CGAATATAGGGTTTTTAGTATATTGTTTTGTTTTAGTTATTTGTGGATTATTATGTCTTGTGCCTACAGTGT  
TCGATTGTTTATTATATTGTTGGCTATTTGTCGTTAGTGTGATTCACTTCGTGTAGATTTAATATGATAGGT  
TTAGTTGTTATGATTAGTTCAATAGTTGGTAAATATATGTGCTTTTTAATTTATAGGCCATATAGATTTTTAGTT  
TTTTAAGTTTTTTGTTTTATTTAGATTATTATTTGGAGTTGTAGTAGGTGTAGTGGTTGGTTGTAATTATATTA  
ATATCGTAGAGATTGGTTAGGTAAATTGTTGGGTTGATTTTTGATTGATATGTATAATCGGTATGTTTTGTA  
TATATGAAATTATTTATTTATGTTTGTTCGTTGAGAAATATATATGTTGAGTTTCAAATGATTGTGTTTCTT  
TATTTTTGTTAGTTATTTATTTAAGGTTACTGTTTTAGTAGTTAGTGTGTTTTTTCTTATTTATTTGTTTTT  
TAGTAAATTATTTAAGATTAGTAGTGGTTTTAATTTGTGGTAATATAACGAGTGTTATAAGTTTTATTATTCTT  
CTTCCAAGTAGGAGATCTCAGTTGTTGAGCCGTTATATATAGTTATGAGTTTATTTTATTAGTAAATTAGT  
GTTGTTGTTTTTATATTACCTTGTATATTTTTTTTTCATCCTTTATTTTGGTGTTAATATTGTGTTTATGATTTA  
TTTGTTCATCGTTATGTTAGATGGGAGTTGTAAATATACTACAGATCGTATAGTTGGATTTGATTGTTTTT  
AGTGAGTGAAATAATTGTTTTGCTACTCTTTGTTACTTGTGTTGATTCAAGATTATTATAGTAAGCCGAT  
TGCATATGCTTATGGTGCTCCAATGGTTGAAAGTTGGTTGTTGATATCTTCTTCTTTTTTATGACTTCATATCG  
AGGTTAATAATACTAAGTGATGTCATTTATTTTAAATTGGAGGATTATCTTTCTTTTTTTTTTATGATAACT  
GCTGTTTTAGAGGTTATAAGGAGTGGTGTAGTAGATTATTAATCCGCATGCTGCGGCTTGTTATATGACTAT  
AGGTTTGCATTTTATACACGTTGTAATAGGTACTGTAGGATTGACTCAATTGGATTATTTTTAGATTTGATGT  
TGTTGCTCGTTATAGATGGATGATTGTTGTGATTGGCATTGTTGATTATGTATGGTTGGTTGTTTTTACCAT  
TGTGATTGTTAGTTAAGTTAGTTGGTTACGTTAGCCAGGTGTGATGTGCATATAGATTTTTCGTTTCTGT  
GGAGTTAGATTGTTTTAACGGTTAGCATAAGTTAGTTTTATGTAGGTTAAATAAACCGTTAGTTTGTGGTA  
CTAAAGATTTTATGTTTTGAACTAAAATATTGGATGTTGAAAGTCATTTCGTCTAATTTGGTTGATTGCTACT  
AGGTTGTCTCTAAATATTTTGGTGTGTTGGTTTTGTGTTGAGTATTTTTATGGTTATTCAAGTAGTTTCTGG  
AATAATTTGTATTATTTATGATGTTTAGGTAAATTTCTTTATTAATGATGTGGACTGATGATAGAATTTGA  
TGTTGATTATTCGTTACACGCATATATGATGTGTTAGTGTAGTGTTTTTTCTTATCTATACTCATATGGGTCGAA  
GGTTGATTATGGGAGGTATCGTTGCTTGGCGTTGAAAAGTTGGGTTTTGATTATATTCTTGTGATGATT  
GAGGCTTTTTTAGGTTATGTTTTACCATGACATCAAATGTCTTATTGAGCTGCTACTGTATTGACTTCTATAGTT  
TTAAGTATTCCTGTTATTGGTGTAGGTTGTATAATTATATTGGTGGATTTCTGTTACTTTGGTTGATACAC  
TTATTCGTGATTTCTGTTTATATAAGTTTGGGTTTTGTTTTGTAGGATTAATTTTGCATTTATTTATTT

GCACTTGTATGGTTCAAGTAGTCCATTGTTTATTTATAAAAATTATAGTGATTGTATTTATTTTCATAGTTATTATT  
CTATAAAGGATTTGTTTGTGTTTTATGATAGTTATTTCTTTAGTTAAATTTATGATAATGATTGATCCAAAAATGAT  
ATTAGATGTTGAAGCTTTTGTGTTGCCAATCCTTTGGTGACTCCAGAATCTATAAAGCCTGAGTGATATTTTT  
TGCTGTTTTATGCTATGCTACGAAGAGTAGACTCAAAGATAGGTGGTTAATATTAGTAATTTTCATTTTGGTT  
GTTTTGTGATTGCCAACAAAGTAAATTTAGATCTATATATGTTTTAGATCGTCAGATTTTTTTTTGACTTATGGCT  
AGTTTATTTTTATGCTTAGTTATTTGGTGGTTGTCATGCGGAGTATCCTTATATTTATGTGAGTAAGGTTATA  
AGGTTTTTTATGTTAGTTTTATTAGTACTTATAAGGTGTTGTGGATTATTCCATTGGGTGTCGATAGTGATTAC  
GTAATTTATCAAGTTTGATAGATAGATTATATCTATGTTTTTTAATTTAAATAATGTTATTTGTCATTTTTACT  
TGGAGGTGGTTTGTGTTAATTAGACTGGTAATATGTAGTCACTATTTGTTAAATTTAATAGTTCTTGAGA  
GTTATAAAGTTTTATTATTATAATTTGTTTGTAGTTAAAGTTCAGGATTGTCAAGTTGTTTTTCAATTCGATGAT  
GGCTTTGTTTGTGTTAGAGGCTTCAATAATGTTAATTGTTGTTGGTATAAGAATATGTCACGGTTCACCTCGTG  
TTTCAGGAGGTTTATAACTGGATTTGTAGTCACTTTTATTTTTACTTATCTTTATTCTAGTATATGGGTTTCA  
GATAGTTCTATGGTAATGGTGGGCGTTAAGTATTATTTATGTGATGGTTTAGTTATAATTGATACATTATCATGTT  
TAATGATTTTTTAACTTCTATAATGACTTGTATTGTGGTTAGTTGGTTCTAAGGATATAGTTTTATTATTAGT  
GTTTTTAGTGCTATGATTACATATGTTGTATCTAAATCTTAGTATTTTGGTTTTCTATGAGCTTTCAATTATTAG  
GGCTTTATATATGTTAATTGTTGGTAGTCTTATCCAGAACGTTATTTCTAGGTGATATTTGGTGGGTATATA  
CTATTAAGTAGTGTCCGTTGCTATTGGGTATTTGTTTTATTGGTTTGAATAGTGGTAGGTTTAAAGTGATTTT  
GTGAGATAAGGGGGATATGTGTGATTCTTATGGTGCTTTTTGCTCATTATAGTAATGTTTTGACTAAGATTC  
CTGTTTTCCATTCATGGTTGATTACCACTAGTTCATGCTGAAGCTAGGAGTCTGTGAGTATAATATTAAGT  
GGTTATATAATGAAGTTGGGTTTAGTTGGGTTAGTGCCTTTATGTGGATGACTATTAATTGATTATATATATTATT  
TTTCTACTTTTTTATTATGCTATAGAGTAGTTTATTAGTTGCAGCTGTGTTGAATGTGATTCTAAGCGTTGAT  
TGGCTTATCTTAGGTTGTCTCACATATTGATTGGTGTATGTATTTACTAACTTCTACGTATTGTGGTGATTATCT  
TGCTTTCATATATTGTTAGGTCACGGATTATCTGTTGCTTTATTGTTTATGGTTATATGATTTGGTTATGAGATT  
AGTGGTCTCGTAAATGGGGTATACTTGTCAAGATATTTGGTGGTGGTTAATTATGCATTTTATTATGGGGTT  
TGTGTTTTTAAAAGTTTGTGGGTTTCCACCAGCCTTGCAGTTTTTGGTGAGTTATGATTGGTTATAAAATATA  
TTACGTTGGGTGATATAATATCATTATTATTAGTATCTATTTACATATTAGCGGTAGAATAATAGTTTTATTATT  
TATGGTTTAGTAATATGTTCTCCTATTAATACAAGATATGAGTATAGTGGTGGATTGGATAAATTTTTGTTTTGTA  
TTATGTATTTAAGTTTATAAATTTAATTTTGTATAGTATTATAGCTTAAGATATATGACTATTATAAAATGTAA  
GAAGCTAAGTGAATTTATTGCATGTTCTTGTGTTGGTCAGGATGGGGTGGGTGCCAGTTCTATTTTATTT  
AATTATTAGGTTTGTGAATTAAGCCAAAATTTTTGATTTAGTTGCGATTATTCCTTTAGCTTAATATTGAGA  
GTGTCAGTTTGAAGGTCTGGAGGTATATTTATATAGAGGTGGATATTAAGTTAATAAAAAGTGTATGATTCAT  
GTTTATGATTGTGCGGTAATGCACATATCCTTATGTTATCTGGTTATGGTTTACTAGATTTTTGGTTAAGCTG  
TCTAGTTATTTAAAGGTGATGAAGATTGAAATGTGGTATAGCTTATCTTGTGTTATACTGATTTTTGTATTGCC  
ATAGTTGTTTTCCATATGTTTACGGGATGTTTATTATGGGTTATGTTAATAGTGTAAATTATGCCATTGTTTA  
TCTCCTTGTTTTTTAGGCGAATGTTTTGTGCGTTTGGTTGTTTGTGTTCAAGGTTTATACCAGTTGGTTGTCCG  
ATATACTTAGCACCGTTTGTGTTGATAATAGAGTTAATCAGGTTTGTATACGTCCAGTCGTTTTATTGGTCCGT  
CCGTTTGTAAAATAAGTGTGGTGTATATTTGGTGTATTTGTTGGTAATTTGTGCTTGTCTTATAATTATTTTA  
TTTTGTAAATTTTTTGTGCTGTTTGTGTTATGAGATTTTTGTTGCATTAATGCATTGATTTATAGTACAAGAGAT  
ACTTAAGTTTTCTGTCGATCATTAAATTAAGTTTAGACATATGCTTATTCATTTTGGCTATTACTATTTGTTG  
TCATTATGTGTAAGTCTGGTATTTTCAAGTACTTATTGACTTTTTGATTATTATTAGAGTTATGTAGGATAGTA  
GTTATCCATGTTTTTATTGGAATGATAATATTAGAGCCTTGAGTCAGGTTGATGGTCTGCTTTATTATTTACTT  
GCAACCAGTATATCATCTTCAATTGATTTGGTGGTATTTTATTTCTGGTATTTTTTTTTTTTTTTTTTTGGTT  
TTTTTTAAAGTTCGGTGTGTTCCCTTTATTTTTGGGTTTATCAGGTTTTTACATCAAGTAAGAGTTGAATA  
ATTTGTTGATGATTTCTACTGTTTTAAAGTTTCTGTTTTATATATTAGTTTTTTGTGGGTCAATTTAATATATC

GTTGGCTATTATTCTGTCTAGATTGGGTATATTAATTTCCGGTGTGTTGATTGGGTTAATAGTATTAATTGGTT  
TGCTGTTTGATGTTATATGATGGTTTCTTCTAGTAAAGTGATAGTTTGTTAAGTGTTGATTGTTTCGTTTTTTAA  
TTTGCTTATAGTTTATTTAGTTTATTTTATTTGAAGATCTGGTGTATATTTTATTTAAGTAGCTTTTATGGTGGT  
GTTTTTGGATATGTAGTTTGGTTAATAGCTATTCCTTTGAGTTTTGCTCTTTATTATAAGATTTATGTTAGTTATT  
TGTTGATTGGATTAGGGTGAGTATTTGTTTTTTTTGAGTATTATATAGTTTTTTAGAGCAGTTTTATTTATTTA  
AGTGGTTAGTTAGTAGTACTGTACCAAAGAGTACTTGATGAGGACGTGGGAAGATCTTGTTTTAGTTTTAAC  
AGTATATTTTAAGTATAGAATGTCTGTTCTGCAAACAGATGGTGAAGATAATTTTCTATTGTTATTTTTTTCTTT  
ATTGATTACGTGCTTAGTTTTATTTAGAATTGGAGTTTGTGAGGCTTTAGGAATCTCTTTTGGATAGTGCGTTA  
ATGAAAATAAGTATGAATATATGAACTTTTTAGTTTGGTTAGAGGGTTTGTGGTGGTTTTGTTTTAGTAGC  
ATTTTTTATATTAAGGGAGCGTAAGGTTTTAGGGTATATTTCAATTGCGTAAGGGTCCGAATAAGGTTGTTTA  
GTTGGACTATTTGAGTTTTGCTGATTTTATTAAGTTATTAAGTAAGTATAAGATCGATGGTTATACTGTTTCAT  
AGTTGGTTTAGATGATTTGGGTGTGCTATATTATTAATATGTTCTTCTATTGGTGTATTTATTTATGCTAGTACT  
GTGGGGGTTTTGATTATAAGTTTATGATGTTGTACATTTAATTTTGTCTACTTTTACTGGTTATGGTTTGTGTA  
TGTTAGGTTGAGGTTCTTGAAAAAGTATAGATTGATTAGTGTCTGTTTCGTGTGGCTTTTGTAGAATAAGGTT  
TGAAGCTACTTTTATGTGTTTAGTATTAGTATTGGGTGTAATATATAATGATTATGGTAAATTGGATATTACTTATT  
TGATTGTTATTGCTCCATTAATTTTCTTGGTCTGTTTCTTGGCTGCTGAAAGAAAACGTTCTCCATTTG  
ATTATGGTGAGTCCGAGAGTGAATTAGTTAGCGGTTTAAATACTGAGTATAGTGGTTTATCATTATAGTGATA  
TTTGCTTTTGAATATGTAATGATGTTTATATCAAGATGAATTACTTCAATAGTTTTTTTATGGAAGTTATATTGGTT  
TAATTATTTTTCATTTGTTTTATTTATTTGAGCACGTGGTACATTTCCGCGCGTTCGTTATGATTATTATGTGGC  
AGTAGTATGAAAGTATGGTTAGTTGTCTCTTAAATATATTTGTTAAGATGTTACGGATTGATTATAATTATAAG  
GTAGTTTATGTAGATTAATTAAGATTGTGAGGCTGTTAACCTTAAGGTGAGTGTAATCCATAATCGTTAAT  
TTTAGATTATATATTGAGTTAATTTTTATTTAGAATATAAACTTTGGGTGTTAAGGATTTGAATTTTCAAATTA  
GCTGATTATTACGTTACTTATATGACTTGTGTTATATTTAGCCGAGAGGGCTGCTAAGCAGGTTACTCCGATAT  
AGTAAAATGTAAGAAAGACTTTTTCTCGGTATTTTGTAAATGTTTCATAGATATCTTAAGTATAAAGTGGAG  
GATTCCTAATTCCTTGATGTTAATTTATATAAACTCTGTGAGGTTATGTATATGATTTTTTTTTTTTTTTTGGTG  
TTTTATTATAGTTTTAGTTGTTTCGCTTTTATATGTTTTATTATTGGGGTTATAAGAATTTAGATTATAAGATTGGT  
CGGGGTAAATGAGTTGATTCATTTGAGTGTGGTTTTATGACTCATGGGTTTAGGGAGAATTTTTTTAGTTTTT  
CTTATTTAAATCTTTGGTTTTTTTTGTTATATTTGACTTAGAGATATCTTTGTTATTAAATGTTCTTTTATGAGG  
GTTTGATATAATAGATTCTTTGTTATATGGTTTTATGGTGATGATTTAATTATGTATATAATTGAAGTTTATTAT  
GGTTTTGTTACTGAACCAATTAGTATTGGTTAGCTAAATAGTTAGTTTACTGTCTGTTTTCAAACGGG  
AGGTGGTTACGTATGATGTAGTCTTTAGTTGGATTTAGGTTTGGTTTACTGGCGTAATTTTTAATTTAAAATAT  
TTGTTTTACACACAAATGATGGGTAATTTACTCTGTGCTATAAGTATCGGAAGTAATATATATTATCGCTGCTA  
ACGATTGATTTGAAGTTGTAATAATCTTACTTTCTTAATAAGTGGATTGACGTAAGAATTTATATGAATTGTA  
CTTAAAGATTTGTATAGTTAATTTATTTAATGTATCGGTTACGTTGGTGAATAGAGGATCAGTTAAGTACGA  
AAATAATAAGGATTTGATATCTTGATTTGTCTCTTTGGATCATAAGCGTGTGGTGTGTTTATATTCTTGG  
AGTGTGGGGTGGATTTATAGGTTAGGTTAAGTTTGTGATACGTTTAAATTTTTGTGATCCTTATTATAAAC  
TTATTCCTTGAGGATATAATTATTTGATACTAATCACGGTATAGCAATGATTTTTTTTTTTTTAATGCCTGT  
TTAATAGGTGGTTTTGGTAAATATCTTCTCGTTTTTTTTGAGTATGAGTGATTTAGCTTTGCCCTGTTTTAA  
TTCTTTGAGTGTGTTGAATGATGGTTCCTTCAATATTTATATGGAATTGAGTTTGTATTATGGATCTGGTGTGG  
TTGGACCTTTTATCCACCTTTGTCTTTTACTACTTCTGGTGTGGTGTGGATTACTTAATGTTCTCTTTACA  
TCTTGCTGGTGTATCTAGTTTATTGGTTCTATAAATTTTACTACTATAATGTTGCGTCTAAGGTCATGTTCT  
TCAGTTATTAGATGATCTATTTATTTACTTCGGTGTGTTATTGTTATCGTTGCCGTTCTGCTGCAGGTATA  
ACTATGTTGTTGTTGATCGTAAATTTGGTACTGCTTTTTTGTAGCCAGCAGGTGGTGGTGTGATCCTGTGTTATT  
TCAACATTTATTTGGTTTTTTGGTCAACCAGAAGTATATGTTTTGATATTGCCTGGATTGGTATAGTAAGTCA



TATATGTATGTCTTTAAGTAATAATAATTCTTCGTTTGGATATTATGGGTTAGTTTGTGCTATGGGTTCTATAGTG  
TGTTTGGGGAGAGTTGTTTGGGCTCATCATATGTTTATGGTTGGTATGGATGTAAAGACTTCTGTTTTTTTA  
GTTCTGTAACAATGATTATAGGTATACCAACAGGTATTAAGGTGTTTTCTTGATTATATATGTTAGGGAGTAGT  
GGGTTGCGTGCGGCTGATCCAATACTTTGGTGAATTGTTGGTTTTATATTTTTGTTTACAGTTGGTGGTGTTA  
CTGGGATAGTTTTATCTGCTTCTGCTTTGGATAGATTATTTACGATACTTGATTGTGATAGCTCACTTTCATT  
ATGTGCTGTCTTTGGGTTCTTATAGGAGTGAATTATAATGTTTGGTTGGTATGACCTTTTATAATTGGTTGTT  
CTTTAAAAAAGTATTTGTTGCAAGGTCATTGATTATTGTCTATGGTTGGTTTTAATTTGTGTTTTTTCCGATGC  
ATTATTTAGGTGTTTATGGGTTGCCACGTCGTGTTAGATGTTATGATCCTGAGTTTTATTTGGTTAAAGTTTTTA  
GGAGTATAGGTGGTGTGTTATCTGTAAGTTCGATGGTTTTATGTTTTATTATGAGAATCGTTGAGTGTT  
TATAAATGTGTGTTAGGTTTTATGAGGTTCTGTGGGTGTGTATGTAATGTTCTAACTTGCTCATACCTTATCATA  
TTGATTATATAGCTGACGGTAAGAATTGATCAAAGTATTAGATTATAATAGTGTGTGTTTAAAGGTAATTG  
ATATGATTGTAGTAGTTATATAAGGATACATAGTTTAAAGTAAAATGATGCTTTTGTAAGCATTGATAGATGAA  
GTATTTTCTGTTTTCAATTAAGATTAGAGTCTGCTGTAAATAGTTTTGTCTTTGGTTAAAGTACCTTTTGCATC  
ATGATTCTTTGAGATGTTTAGATTATTTCTAGTCCCGAATGGCTTATGATTTTCATTGATTATAGCAAGTTTG  
TGCATAGATAAGTTGTTGTGTAACATTTGTAGAAATCATTGAGGTTGTGATAAATAATTCGTATAGTCTGATAA  
CTGGTTTTATAGCTTGATTATTTCAACGAAATAAAGATTGATTGTGTTTATCTTTACTGATAGAGATAGTTTATAT  
GTTGTTGTTGAGTCTTGGATTAGAATTGCCTAGGATAAGTTAGTTATTTACTTGACATTTTATTTGTATGTTTT  
CTTATTGTTAATGGCTATATTCTAATTATTTGTTAATAATGAAGAAATGAGTAGGATTATGTTTTATTAGTCGG  
TTATTTGTCTTTAATTCTGTTCAACTGTTTATCAAAAACATTGCTATTTGTTGGATTTAAATAGTATGGCCTGCC  
AATGTTGTAAATTAATGGTCGCAGTTTTACTGTGCTAAGGTAGCATAATATATCGCTTCTAATTAGTGGCTTGT  
GAATGGTTAATGAAATAGAATATTTAAATGATGACTATATCTGAAATTGATTTAGTGGTGCAGGAAATCCATTGTT  
ATAATATAAGACGGAAAGACCCCGAGATCTTGAATTAATTTCTAATTTTGTGTTGGGTAATGTATATATTTCA  
TTTTTTTTTAGATCCTATATATTGATGGATATAGGTTAAAGTTACCTCGGGGATAACTGAGTAAAGAGTTGTGA  
GAGGTCTTATTGATCAACTTGTTACTACCTCGATGTTGGCTTAAAGAACCTTTATGGTGTAGCAGCTATATAAG  
GTGGTCTGTTCCGACCATTAAATCTTTATGAGTTGAGTTAAGACCGGTGTAAGCCAGGTGCGTTCTTATCTATA  
AGTGAATCTAGTTAGTACGAAAGGAATATTAGAGTGAAGATGTTGCATGTTAATGTTAGAATACGTAATTAG  
TATACTCTGCAAAAGTATAGATAGTAATGATGTTTTACTCGTATTTTTATACAATTTAACCTGGTTGAAGTTGA  
AATATATCTAATGATGCTATATACGTTTATTATATTATGCTAATCCTTGAGCATATAAATTTGAGGTGGTTGTAGTA  
GTGAGATCTATCGTTATAAAGAAATTTAGTGATGGTTGTTAGATAGTAGAAGAGGCTAAAGCACAGTGCCAG  
CAGCCGCGGTTATACTGTAATCTTCTTATTTCTTTTTGGTTAAAACCTTTTATTGAAATTTAAATAAAATTTGGTT  
GGTTAAATAGGTTTTTTTTGAGAATACTTCAATGATGTGTAAGTTCCAGTATAAAGACAGGGATTAGATAC  
CCCTTATTAGGATAAAAAATTTTTGTCCACGGTTTCAAACCTGAAAGGGTTTGGCAGCAAACCTAAATCTTCC  
GGGGGAAGGTGCTTATTAAGAGATGATCCGCTTATTAATTTACTATATCTAGTGTTAGTGATATCCGTTTGTA  
TATTCACGCTTAGAGGTCATAAGTGGTAAATATTAATAATTTAAGGCAGGTCTATATGCTGCTAATGGTATA  
GGTTGTTGTGCGTTACAATAAAAAAGTTTAAATACTGAAATGTATTTTTATTTGGGACTCGGAAGTAGGAATG  
TAAATAGTATGTCATTTGAAAGGTTGAAATAGTTTGGGTACACATCGCCCGACAATCTCGATGCGTAATTGAG  
TTAAGTCGTAACATGGTAGTGCTTGAAGAATCAGGCGCTAGAATCTGTATAATGCGTTAAAACATGAGCTTT  
TAATTTATTATGACCTAGTTAAATACGTGTTATTTTTGTGTTGTTTTATTCCACTGTGGTGTATGATAGTGATGTG  
CTATCAAATATATAATCCCGAAAATGAGAATAATGTTACCTAATGAAAGTCCATTTTTAGAGTTTATTTGAAC  
ATTGATACCTACCTTATGTTTGTGATTTTATGTTTTTTAAATTAATTTAATTTATAATAGAGTTCAAGTTA  
TGAAAGAACCAATAAAGATAGTTGGCCATCAGTGATATTGAACATACGAGTTGTTGGATGGTAGGGTTTATGA  
TTCATTTATGACTGATTTTGTAAAGGGGTTAATAAGCCGTTACGCTTAGAGCGTAATATTTCTTATTTTTATTA  
ATTACATCTGATGACGTTATTCATTCTTTTTCTGTTCTGATTTGGGTTAAAGATGGATGCTATACCAGGTCGA  
ATCAATAGTGTATAGGTAGATTGATCGTTTTGGTGTCTTCGTCGGTTATTGACTGAATTATGTTGGTCTGG

TCATAGGTATATGCCTATAGTAGTTGAAGTTGTTGAGGGTAATCGGCTTGGATGATATTAATGTTTAGATAATGA  
TTACTTCATTATTTTGTATAACTATTTTATTTGTATGTATTGTTTTACGTTTAGAGGAAGGTCATTATTTGCGTGT  
TTTTAATAGTGGTAAGGTCCTTTAGTGTTGGAATGTTTATTTTTATTGCAGTGGGTCTAGTTGATATTTTTTA  
CTATTTGTTTTAATTTATTTTGGTGGTGTACATATTGTTGTTTATATCAGAATGATGCTTCTAAATCAGGTG  
TATCAAGTATGAGGTTTAGGTATTTTTCTTCTTGTGGTATTTTTTTTTTTTTTTTTTTTTTTTTTTTTTTTTGCTAT  
GAATTTTTAGGTAATAAGTTATTGAGTATAGATTTTACTTGTGTAGAGATTTGAGGCTGTTGTTTATAAATTT  
TTTTGTTGATATTATTATTTGGTATGTTTATAGTCAGTTTAAATGATAAGAAGAGTTAAAGAGTATAGTCGGTAG  
GATTATATATGTACATACGTATATTTAGCTATTTTAAGTTAGTACATTAATTAGTGTGTGTAGGTTGAAGTTTAA  
CGGCTTAGTATAAGAGTTTAACTAGAAAATTGTAATTTCTAAATAGGTTATTCCTAGTCGAAATGCTAGTTAG  
TTTTGTAAGATGCCAGATTTGATGGGTAGTGTTAGGATTCTATTATGGGACTAAAAGAAGTTTCTCTTCAA  
GCGTGAAAGTGTTTTACATTGTTTAAATTTGAAGTTAATTTATCATGATTAATTTATGATACGCTTAGTGAG  
TTAACTTAGTTAAAATTTGTTTTTTGTAATTAAGTTATCTAACATTTAATTAAGGGTTGATTTGGTTTTACTA  
AGTAAGCTAGTAATTAATGTATTAAGTATTAAGTTAATAACATTTGTACAAGTGCCAGAGTAGTTATGGGTTG  
GCTTTAAGCGTCAAATATAGACAGTTATGTCTTGTGTT
